# Supplementary material
Source: publisher figshare collection journal article supplement (https://springernature.figshare.com/ndownloader/files/16342205)
Supplement: Supplementary file [file 16342205]

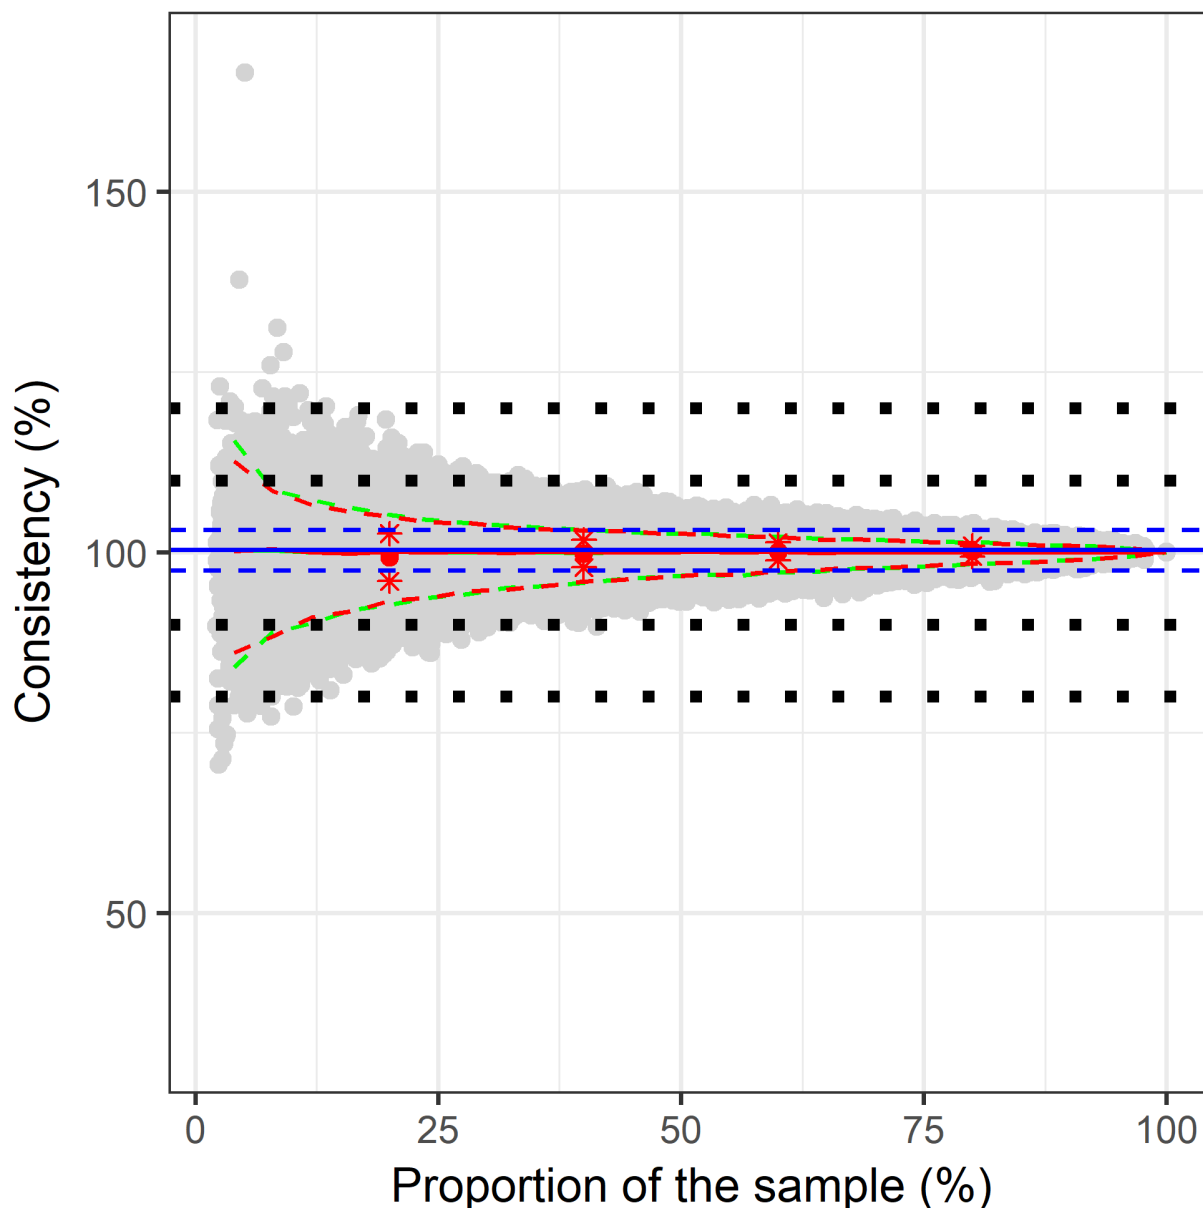

**Additional file 11: Figure S8.** Consistency for the estimated number of species per sample calculated by a subsample based on fresh weight. Grey points indicate the consistency for the estimated number of species of the bootstrapped subsampling of grid cells. The red lines for the fresh weight and green lines for the dry weight indicate the bootstrapped mean (solid) and 95% confidence intervals (dashed) of the subsampling dataset. Red points (mean) and red stars (standard deviation) indicate the results of proportional sampling with 20, 40, 60 and 80% of the grid cells. Blue lines indicate mean (solid) and standard deviation (dashed) of the estimation with the image processing software ImageJ. Black squares indicate 10 and 20% error
